# Supplementary material
Source: PubMed Central journal article supplement (PMC6919283)
Supplement: Supp_Fig2.pdf [file Supp_Fig2.pdf]

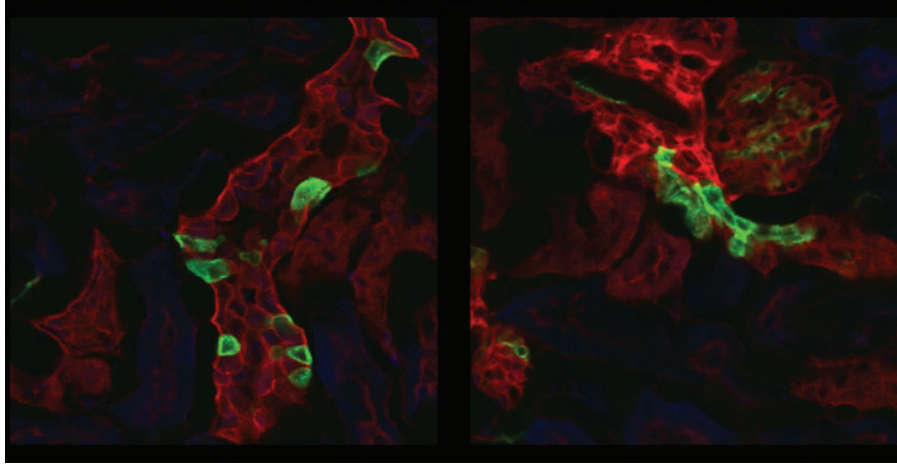

**Supplementary Figure S2.** Higher numbers of tubule epithelial cells transduced with higher dose of AAVrh10. An mT/mG mouse was administered a retro-ureteral injection of  $1 \times 10^{12}$  GC of AAVrh10-Cre and sacrificed at day 7. Shown are representative confocal microscopy images of tubule structures containing higher quantities of transduced cells than images in Figure 7. Magnification  $20\times$ .

---
